# Supplementary material for: Biochemical and structural controls on the decomposition dynamics of boreal upland forest moss tissues
Source: Copernicus journal article supplement (doi:10.5194/bg-2018-290), 2018-06-21
Supplement: Supplementary file 1 [file bg-2018-290-supplement.pdf]

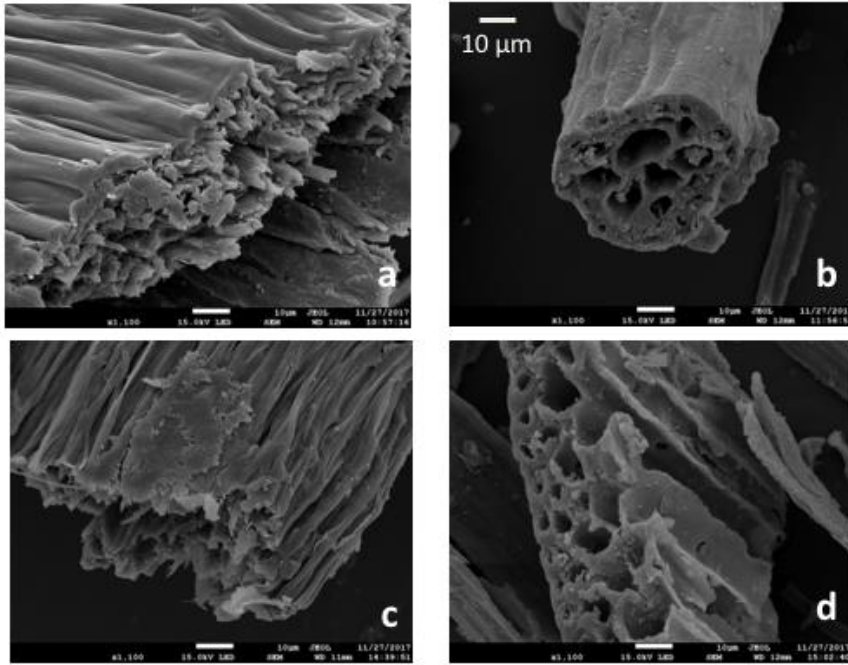

**Figure S1. Additional electron micrographs of moss tissues before (panels a and c) and after (panels b and d) incubation. The top panels (a and b) depict mosses from the cooler forest, and the bottom panels (c and d) depict mosses from the warmer forest. Post-incubation moss tissues were imaged using ground material, while the pre-incubation images used dried but intact material.**

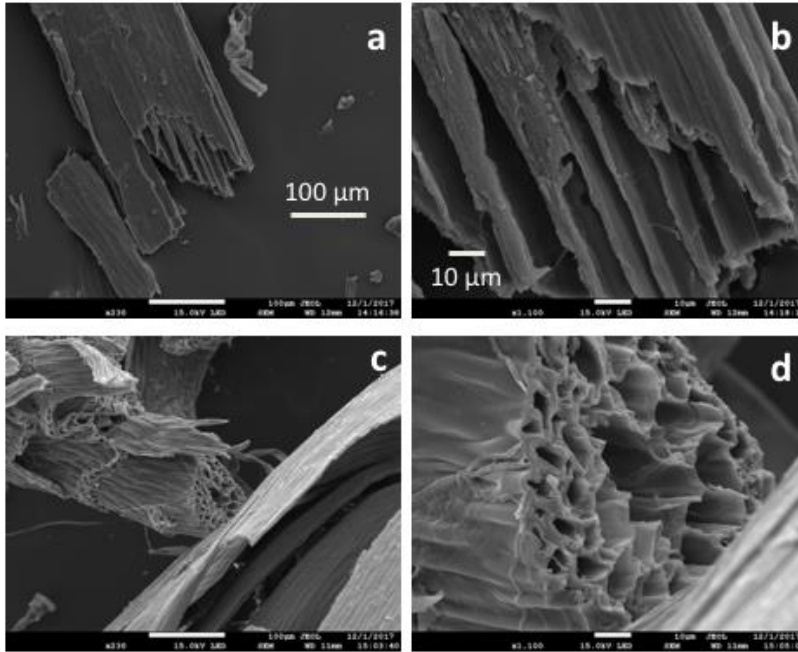

**Figure S2.** Electron micrographs of moss material isolated from the L horizon of the cool region (a and b) and the warm region (c and d). The left panels display low magnification (x230) and the right panels display the same areas of interest at higher magnification (x1100)

**Table S1. Mass loss, elemental, and isotope composition of moss tissues during decomposition**

| Region | Temperature<br>°C | Time<br>Days | %C  | %N    | %Mass<br>remaining | %C<br>remaining | %N<br>remaining | C/N<br>atm | d13C | d15N   |       |
|--------|-------------------|--------------|-----|-------|--------------------|-----------------|-----------------|------------|------|--------|-------|
| SR     |                   | 5            | 0   | 43.02 | 0.56               | 100.0           | 98.7            | 94.9       | 89.6 | -33.06 | -3.37 |
| SR     |                   | 5            | 0   | 43.67 | 0.61               | 100.0           | 100.2           | 103.4      | 83.5 | -32.17 | -3.01 |
| SR     |                   | 5            | 0   | 44.05 | 0.6                | 100.0           | 101.1           | 101.7      | 85.7 | -32.1  | -3.19 |
| SR     |                   | 5            | 69  | 43.83 | 0.65               | 82.9            | 83.4            | 91.4       | 78.7 | -32.9  | -3.42 |
| SR     |                   | 5            | 69  | 43.9  | 0.65               | 82.8            | 83.4            | 91.2       | 78.8 | -32.13 | -3.6  |
| SR     |                   | 5            | 69  | 43.07 | 0.71               | 83.3            | 82.4            | 100.3      | 70.8 | -31.84 | -2.89 |
| SR     |                   | 5            | 283 | 43.29 | 0.7                | 91.4            | 90.8            | 108.4      | 72.2 | -31.55 | -2.14 |
| SR     |                   | 5            | 283 | 44    | 0.66               | 84.6            | 85.4            | 94.6       | 77.8 | -32.18 | -2.64 |
| SR     |                   | 5            | 283 | 43.26 | 0.73               | 83.6            | 83.0            | 103.5      | 69.1 | -31.84 | -2.32 |
| SR     |                   | 5            | 648 | 43.92 | 0.7                | 73.0            | 73.5            | 86.6       | 73.2 | -32.16 | -2.55 |
| SR     |                   | 5            | 648 | 44.6  | 0.73               | 72.6            | 74.3            | 89.9       | 71.3 | -32.46 | -3.17 |
| SR     |                   | 5            | 648 | 44.38 | 0.7                | 72.9            | 74.2            | 86.5       | 74.0 | -32.77 | -2.35 |
| SR     |                   | 5            | 959 | 44.4  | 0.71               | 73.0            | 74.3            | 87.8       | 73.0 | -32.33 | -0.3  |
| SR     |                   | 5            | 959 | 44.1  | 0.96               | 68.8            | 69.7            | 112.0      | 53.6 | -31.86 | -1.76 |
| SR     |                   | 5            | 959 | 44.83 | 0.8                | 68.0            | 70.0            | 92.3       | 65.4 | -32.02 | -1.7  |
| SR     |                   | 18           | 0   | 43.02 | 0.56               | 100.0           | 98.7            | 94.9       | 89.6 | -33.06 | -3.37 |
| SR     |                   | 18           | 0   | 43.67 | 0.61               | 100.0           | 100.2           | 103.4      | 83.5 | -32.17 | -3.01 |
| SR     |                   | 18           | 0   | 44.05 | 0.6                | 100.0           | 101.1           | 101.7      | 85.7 | -32.1  | -3.19 |
| SR     |                   | 18           | 69  | 43.77 | 0.68               | 75.6            | 75.9            | 87.1       | 75.1 | -32.45 | -3.3  |
| SR     |                   | 18           | 69  | 44.14 | 0.72               | 75.8            | 76.8            | 92.6       | 71.5 | -32.84 | -2.81 |
| SR     |                   | 18           | 69  | 44.14 | 0.71               | 75.2            | 76.2            | 90.5       | 72.5 | -31.97 | -3.43 |
| SR     |                   | 18           | 283 | 43.58 | 0.84               | 65.8            | 65.8            | 93.7       | 60.5 | -31.98 | -1.02 |
| SR     |                   | 18           | 283 | 43.22 | 0.81               | 66.6            | 66.1            | 91.4       | 62.3 | -31.78 | -0.68 |
| SR     |                   | 18           | 283 | 42.84 | 0.81               | 68.2            | 67.1            | 93.7       | 61.7 | -31.58 | -0.76 |
| SR     |                   | 18           | 648 | 43.97 | 0.97               | 58.0            | 58.5            | 95.3       | 52.9 | -31.82 | -3.72 |
| SR     |                   | 18           | 648 | 42.98 | 0.8                | 60.2            | 59.4            | 81.6       | 62.7 | -32.24 | -2.99 |
| SR     |                   | 18           | 648 | 44.07 | 0.77               | 62.8            | 63.5            | 81.9       | 66.8 | -32.2  | -2.24 |
| SR     |                   | 18           | 959 | 42.97 | 1.04               | 63.3            | 62.4            | 111.5      | 48.2 | -31.76 | -2.69 |
| SR     |                   | 18           | 959 | 43.57 | 1.16               | 50.5            | 50.5            | 99.4       | 43.8 | -31.73 | -2.56 |
| SR     |                   | 18           | 959 | 43.35 | 1.04               | 62.5            | 62.2            | 110.2      | 48.6 | -32.04 | -2    |

|    |    |     |       |      |       |       |       |      |        |       |
|----|----|-----|-------|------|-------|-------|-------|------|--------|-------|
| GC | 5  | 0   | 44.09 | 0.92 | 100.0 | 100.4 | 99.6  | 55.9 | -32.01 | -4.19 |
| GC | 5  | 0   | 43.91 | 0.98 | 100.0 | 100.0 | 106.1 | 52.3 | -31.89 | -3.3  |
| GC | 5  | 0   | 43.77 | 0.87 | 100.0 | 99.7  | 94.2  | 58.7 | -32.21 | -3.66 |
| GC | 5  | 69  | 43.75 | 1.06 | 87.4  | 87.0  | 100.3 | 48.2 | -31.04 | -3.36 |
| GC | 5  | 69  | 43.63 | 1.04 | 81.3  | 80.7  | 91.5  | 48.9 | -31.86 | -3.3  |
| GC | 5  | 69  | 44.51 | 0.93 | 86.0  | 87.1  | 86.6  | 55.8 | -31.74 | -3.92 |
| GC | 5  | 283 | 43.6  | 0.97 | 83.2  | 82.5  | 87.4  | 52.4 | -31.56 | -2.58 |
| GC | 5  | 283 | 43.69 | 0.95 | 83.6  | 83.2  | 86.0  | 53.7 | -31.31 | -2.83 |
| GC | 5  | 283 | 43.37 | 1.01 | 83.7  | 82.6  | 91.5  | 50.1 | -31.39 | -2.92 |
| GC | 5  | 648 | 43.36 | 0.96 | 73.9  | 73.0  | 76.9  | 52.7 | -31.57 | -2.23 |
| GC | 5  | 648 | 44.18 | 0.88 | 74.1  | 74.6  | 70.6  | 58.6 | -31.85 | -2.49 |
| GC | 5  | 648 | 43.78 | 0.94 | 74.1  | 73.8  | 75.4  | 54.3 | -31.6  | -2.42 |
| GC | 5  | 959 | 44.03 | 1.22 | 72.7  | 72.9  | 96.1  | 42.1 | -31.49 | -3.51 |
| GC | 5  | 959 | 44.34 | 1.05 | 71.4  | 72.1  | 81.2  | 49.3 | -31.51 | -0.74 |
| GC | 5  | 959 | 43.94 | 1.09 | 71.5  | 71.5  | 84.4  | 47.0 | -31.45 | -0.57 |
| GC | 18 | 0   | 44.09 | 0.92 | 100.0 | 100.4 | 99.6  | 55.9 | -32.01 | -4.19 |
| GC | 18 | 0   | 43.91 | 0.98 | 100.0 | 100.0 | 106.1 | 52.3 | -31.89 | -3.3  |
| GC | 18 | 0   | 43.77 | 0.87 | 100.0 | 99.7  | 94.2  | 58.7 | -32.21 | -3.66 |
| GC | 18 | 69  | 43.58 | 1.02 | 79.1  | 78.5  | 87.4  | 49.8 | -31.27 | -3.91 |
| GC | 18 | 69  | 42.52 | 0.98 | 78.4  | 75.9  | 83.2  | 50.6 | -31.82 | -3.06 |
| GC | 18 | 69  | 42.54 | 1    | 78.1  | 75.6  | 84.6  | 49.6 | -31.52 | -3.58 |
| GC | 18 | 283 | 42.51 | 1.01 | 71.0  | 68.7  | 77.7  | 49.1 | -30.95 | -1.34 |
| GC | 18 | 283 | 42.48 | 0.97 | 71.6  | 69.3  | 75.2  | 51.1 | -30.79 | -0.54 |
| GC | 18 | 283 | 42.51 | 0.84 | 72.6  | 70.4  | 98.8  | 58.8 | -31.27 | -0.79 |
| GC | 18 | 648 | 42.32 | 0.88 | 63.7  | 61.4  | 60.7  | 56.1 | -31.57 | -2.23 |
| GC | 18 | 648 | 42.39 | 0.78 | 63.8  | 61.6  | 53.9  | 63.4 | -31.46 | -1.93 |
| GC | 18 | 648 | 42.59 | 0.84 | 65.0  | 63.1  | 59.2  | 59.2 | -31.47 | -1.55 |
| GC | 18 | 959 | 42.72 | 1.16 | 60.5  | 58.8  | 76.0  | 43.0 | -30.75 | 0.14  |
| GC | 18 | 959 | 42.77 | 1.13 | 64.9  | 63.2  | 79.5  | 44.2 | -30.77 | 0.9   |
| GC | 18 | 959 | 41.46 | 1.28 | 66.4  | 62.7  | 92.1  | 37.8 | -30.24 | -3.44 |

**Table S2. Total hydrolysable amino acid yields and mole % composition**

| Region | Days | Mol% |      |     |     |     |     |     |     |      |     |      |     |     |     |     | %N as THAA | %C as THAA |
|--------|------|------|------|-----|-----|-----|-----|-----|-----|------|-----|------|-----|-----|-----|-----|------------|------------|
|        |      | Ala  | Gly  | Val | Leu | Ile | Thr | Ser | Pro | Asx  | Hyp | Glx  | Phe | Lys | His | Tyr |            |            |
| SR     | 0    | 11.6 | 13.0 | 7.2 | 9.3 | 4.0 | 7.4 | 7.1 | 6.4 | 13.7 | 1.1 | 7.4  | 4.5 | 4.5 | 0.9 | 1.9 | 51.3       | 2.5        |
| SR     | 0    | 10.5 | 11.4 | 5.4 | 7.7 | 3.3 | 6.7 | 7.5 | 5.7 | 17.5 | 1.2 | 12.0 | 3.7 | 4.3 | 1.6 | 1.6 | 53.4       | 2.6        |
| SR     | 0    | 11.4 | 13.1 | 7.4 | 9.1 | 4.1 | 7.0 | 6.4 | 6.4 | 14.8 | 1.0 | 9.1  | 4.5 | 3.1 | 0.6 | 1.8 | 51.7       | 2.6        |
| GC     | 0    | 10.4 | 10.9 | 5.1 | 7.2 | 2.8 | 6.3 | 6.7 | 5.5 | 17.1 | 0.9 | 16.8 | 3.5 | 4.0 | 1.4 | 1.5 | 56.0       | 4.2        |
| GC     | 0    | 11.3 | 11.4 | 5.7 | 8.5 | 3.3 | 6.0 | 6.9 | 5.5 | 15.4 | 1.0 | 12.7 | 4.2 | 4.7 | 1.8 | 1.7 | 47.2       | 3.5        |
| GC     | 0    | 12.0 | 12.6 | 6.9 | 9.1 | 3.7 | 6.6 | 6.6 | 5.8 | 12.5 | 0.8 | 11.3 | 4.5 | 4.8 | 0.8 | 1.9 | 49.3       | 3.8        |
| SR     | 69   | 11.6 | 13.4 | 6.5 | 8.4 | 4.7 | 7.5 | 7.6 | 6.1 | 14.0 | 1.3 | 7.3  | 4.1 | 4.1 | 1.7 | 1.7 | 40.1       | 2.2        |
| GC     | 69   | 10.8 | 11.9 | 5.4 | 8.0 | 4.7 | 6.0 | 6.8 | 5.4 | 15.2 | 1.5 | 12.8 | 4.2 | 4.0 | 2.0 | 1.5 | 18.9       | 1.6        |
| SR     | 283  | 12.9 | 15.0 | 6.0 | 8.5 | 4.6 | 8.2 | 8.5 | 5.7 | 10.8 | 1.4 | 6.4  | 4.3 | 3.9 | 2.0 | 1.7 | 28.6       | 1.9        |
| GC     | 283  | 11.7 | 13.7 | 6.0 | 8.1 | 4.1 | 7.7 | 7.4 | 5.5 | 12.4 | 1.3 | 11.5 | 4.4 | 2.8 | 1.7 | 1.6 | 32.1       | 2.7        |
| SR     | 648  | 12.6 | 14.5 | 7.3 | 7.7 | 4.6 | 9.2 | 7.4 | 6.1 | 12.9 | 1.0 | 6.4  | 3.6 | 3.8 | 1.4 | 1.5 | 37.4       | 2.9        |
| GC     | 648  | 12.3 | 15.4 | 7.0 | 9.0 | 5.1 | 7.6 | 7.2 | 6.4 | 11.3 | 1.5 | 5.6  | 4.9 | 2.9 | 2.1 | 1.6 | 30.6       | 2.3        |
| SR     | 959  | 12.0 | 16.0 | 7.5 | 8.1 | 5.1 | 8.9 | 7.2 | 6.8 | 13.6 | 1.3 | 4.1  | 4.0 | 3.4 | 0.9 | 1.2 | 22.8       | 1.9        |
| SR     | 959  | 13.3 | 15.0 | 7.4 | 8.3 | 4.7 | 8.8 | 6.5 | 5.7 | 11.2 | 0.9 | 7.1  | 3.9 | 4.4 | 1.4 | 1.4 | 34.0       | 3.1        |
| SR     | 959  | 12.5 | 15.3 | 6.6 | 8.4 | 4.4 | 8.3 | 7.5 | 5.9 | 13.1 | 1.4 | 5.8  | 4.2 | 3.5 | 1.7 | 1.3 | 22.3       | 1.9        |
| GC     | 959  | 12.4 | 15.5 | 7.3 | 8.0 | 4.9 | 7.7 | 6.7 | 6.5 | 12.4 | 1.4 | 7.1  | 4.1 | 3.1 | 1.3 | 1.5 | 24.1       | 2.3        |
| GC     | 959  | 13.2 | 16.4 | 7.3 | 9.4 | 5.1 | 8.2 | 6.5 | 6.4 | 11.7 | 1.6 | 5.1  | 5.1 | 2.5 | 0.5 | 1.0 | 17.6       | 2.0        |
| GC     | 959  | 13.1 | 16.5 | 7.9 | 9.8 | 4.6 | 7.5 | 5.6 | 7.6 | 8.1  | 1.1 | 7.5  | 5.1 | 2.8 | 1.1 | 1.7 | 21.9       | 2.1        |
